# Supplementary material
Source: PubMed Central journal article supplement (PMC9979929)
Supplement: NIHMS1871319-supplement-1871319_Sup_Info.pdf [file NIHMS1871319-supplement-1871319_Sup_Info.pdf]

## Supplementary Information

### **A multi-use deep learning method for CITE-seq and single-cell RNA-seq data integration with cell surface protein prediction and imputation**

Justin Lakkis\*, Amelia Schroeder, Kenong Su, Michelle Lee, Alexander C. Bashore, Muredach P. Reilly,  
Mingyao Li\*

**\*Correspondence:**

Justin Lakkis ([jlakks@gmail.com](mailto:jlakks@gmail.com))

Mingyao Li ([mingyao@penncellmedicine.upenn.edu](mailto:mingyao@penncellmedicine.upenn.edu))

**Supplementary Table 1. Datasets analyzed in this paper.**

| Data            | Data Source                                                                                                                                                                                                                                                                                                                                                                                                                                          | Number of Cells | Number of Genes | Number of proteins |
|-----------------|------------------------------------------------------------------------------------------------------------------------------------------------------------------------------------------------------------------------------------------------------------------------------------------------------------------------------------------------------------------------------------------------------------------------------------------------------|-----------------|-----------------|--------------------|
| MALT            | 10x Genomics<br><a href="https://www.10xgenomics.com/resources/datasets/10-k-cells-from-a-malt-tumor-gene-expression-and-cell-surface-protein-3-standard-3-0-0">https://www.10xgenomics.com/resources/datasets/10-k-cells-from-a-malt-tumor-gene-expression-and-cell-surface-protein-3-standard-3-0-0</a>                                                                                                                                            | 8,412           | 33,538          | 17                 |
| PBMC            | Hao et al. (2021)<br><a href="https://atlas.fredhutch.org/data/nygc/multimodal/pbmc_multimodal.h5seurat">https://atlas.fredhutch.org/data/nygc/multimodal/pbmc_multimodal.h5seurat</a>                                                                                                                                                                                                                                                               | 161,764         | 20,729          | 224                |
| Monocyte        | Generated ourselves. Data will be publicly available after the paper is accepted for publication.                                                                                                                                                                                                                                                                                                                                                    | 37,112          | 22,060          | 283                |
| H1N1            | Kotliarov et al. (2020)<br><a href="https://nih.figshare.com/articles/dataset/CITE-seq_protein-mRNA_single_cell_data_from_high_and_low_vaccine_responders_to_reproduce_Figs_4-6_and_associated_Extended_Data_Figs_/11349761?file=20706645">https://nih.figshare.com/articles/dataset/CITE-seq_protein-mRNA_single_cell_data_from_high_and_low_vaccine_responders_to_reproduce_Figs_4-6_and_associated_Extended_Data_Figs_/11349761?file=20706645</a> | 53,201          | 32,738          | 87                 |
| COVID (Haniffa) | Stephenson et al. (2021)<br><a href="https://www.ebi.ac.uk/arrayexpress/experiments/E-MTAB-10026">https://www.ebi.ac.uk/arrayexpress/experiments/E-MTAB-10026</a>                                                                                                                                                                                                                                                                                    | 647,366         | 24,737          | 192                |
| COVID (Sanger)  | Chan Zuckerberg Initiative Single-Cell COVID-19 Consortia (2020)<br><a href="https://covid19.cog.sanger.ac.uk/submissions/release2/vento_pbmc_processed.h5ad">https://covid19.cog.sanger.ac.uk/submissions/release2/vento_pbmc_processed.h5ad</a>                                                                                                                                                                                                    | 240,627         | 33,567          | 192                |

### Supplementary Note 1: Early stopping

Let  $ES_{max}$  denote the patience parameter for early stopping and  $LR_{max}$  denote the patience parameter for learning rate decay. Let  $count$  be a counter which indicates the number of epochs that have elapsed since the validation loss decreased from its running minimum  $best_{loss}$ . After completing an epoch and computing the validation loss  $val_{loss}$ , check if  $val_{loss} * 1.005 < best_{loss}$ . If so, set  $count = 0$  and update:  $best_{loss} \leftarrow val_{loss}$ . Otherwise, increment  $count$  by 1. If  $(count + 1) \bmod LR_{max}$  is equal to 0, decay the learning rate  $lr$  by a factor  $d$ . That is, make the update  $lr \leftarrow lr \times d$ . If  $count$  equals  $ES_{max}$ , then end training as the validation loss has failed to decrease below its running minimum for  $ES_{max}$  consecutive epochs.

## Supplementary Note 2: Software packages

We used totalVI via the scvi-tools package (<https://scvi-tools.org>). We specifically used version 0.10.0 of scvi-tools and version 4.1.0 of Seurat (<https://satijalab.org/seurat>). The sciPENN package can be found online on github (<https://github.com/jlakkis/sciPENN>).

All analyses can be reproduced using this repository ([https://github.com/jlakkis/sciPENN\\_codes](https://github.com/jlakkis/sciPENN_codes)). All packages, including sciPENN, can be installed following the instructions in that repository.
